# Supplementary material
Source: PubMed Central journal article supplement (PMC4551392)
Supplement: NIHMS701962-supplement-Suppl_Mat.pdf [file NIHMS701962-supplement-Suppl_Mat.pdf]

## Supplementary Appendix

This appendix has been provided by the authors to give readers additional information about their work.

Supplement to: The Action to Control Cardiovascular Risk in Diabetes Study Group. Effects of intensive glucose lowering in type 2 diabetes. *N Engl J Med* 2008;358:2545-59. DOI: [10.1056/NEJMoa0802743](https://doi.org/10.1056/NEJMoa0802743).

## Online Appendix Figure

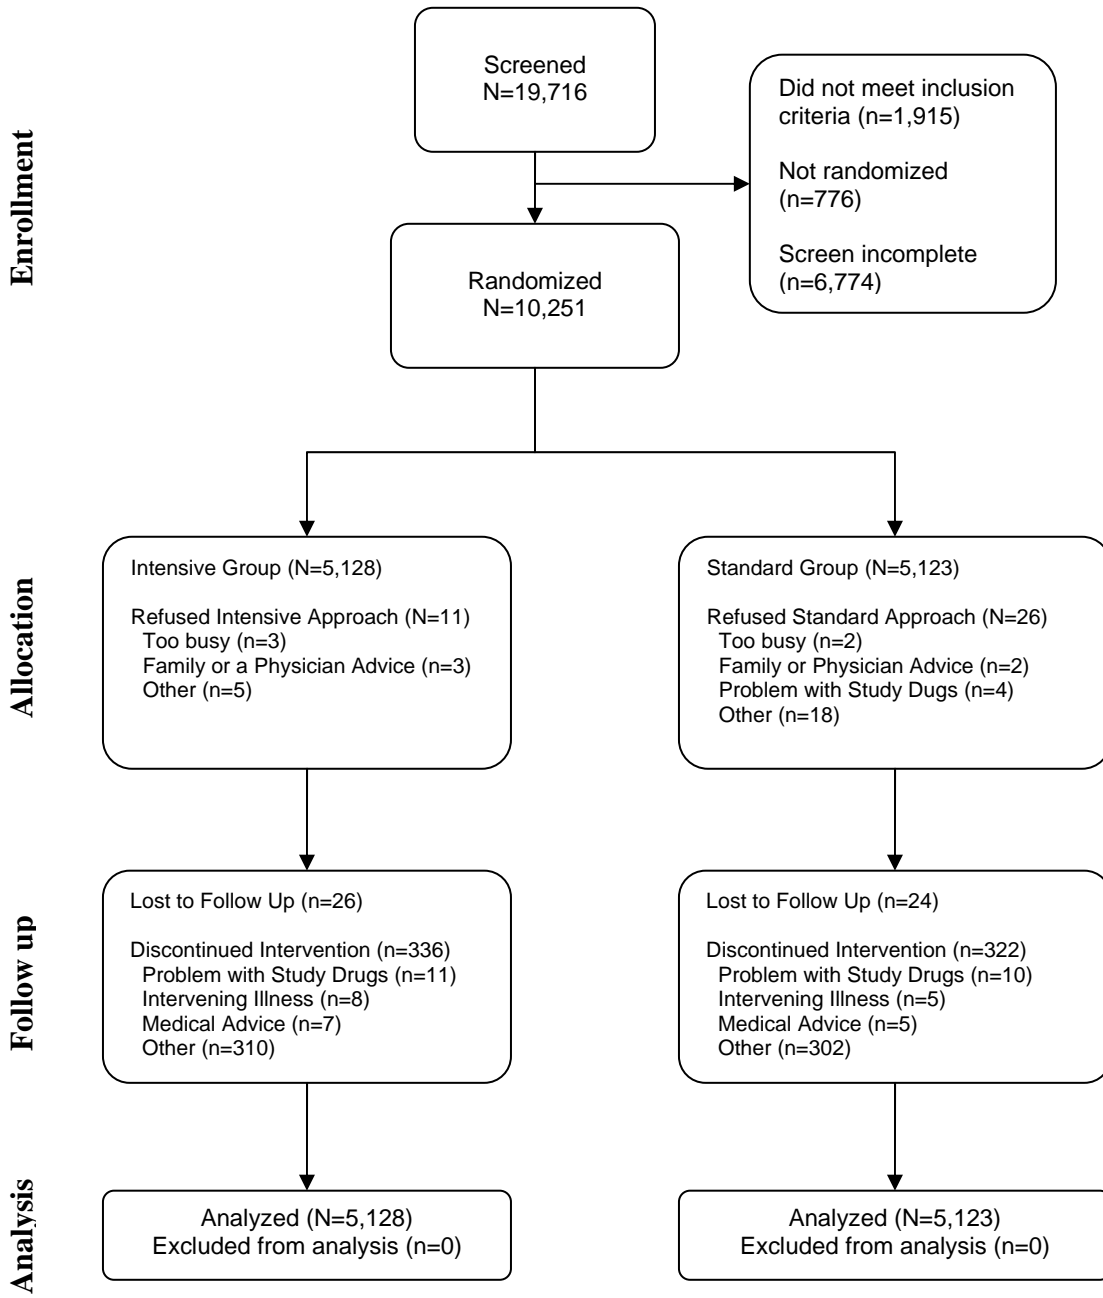

## Online Appendix Table

### Categorization of Mortality Not Related to Cancer or Cardiovascular Disease

|                                          | Intensive<br>(N=5128) | Standard<br>(N=5123) |
|------------------------------------------|-----------------------|----------------------|
| Not Cancer or Cardiovascular Disease     | 50 (0.98)             | 35 (0.68)            |
| Respiratory Causes (excluding pneumonia) | 12                    | 1                    |
| Infectious                               | 19                    | 17                   |
| Accident/Trauma                          | 8                     | 9                    |
| Renal Failure                            | 2                     | 1                    |
| Liver Disease                            | 5                     | 0                    |
| Neurologic Disease                       | 1                     | 3                    |
| Other                                    | 3                     | 4                    |
